# Supplementary material
Source: HighWire-hosted journal article supplement (http://molpharm.aspetjournals.org/highwire/filestream/77485/field_highwire_adjunct_files/0/Supplemental_71654.pdf)
Supplement: Supplemental_71654.pdf [file Supplemental_71654.pdf]

**Supplemental Data****WNT stimulation dissociates a Frizzled 4 inactive state complex with  $G\alpha_{12/13}$** 

Elisa Arthofer, Belma Hot, Julian Petersen, Katerina Strakova, Stefan Jäger, Manuel Grundmann, Evi Kostenis, J. Silvio Gutkind, Gunnar Schulte

Section of Receptor Biology & Signaling, Dept. Physiology & Pharmacology, Karolinska Institutet, S-17177, Stockholm, Sweden (EA, BH, JP, KS, SJ, GS)

Section on Molecular Signal Transduction Eunice Kennedy Shriver National Institute of Child Health and Human Development, National Institutes of Health, 35A Convent Drive, MSC 3752 Bethesda, MD 20892-3752, USA. (EA)

Faculty of Science, Institute of Experimental Biology, Masaryk University, Brno, Czech Republic (KS, GS)

Molecular-, Cellular- and Pharmacobiology Section, Institute for Pharmaceutical Biology, University of Bonn, 53115 Bonn, Germany (MG, EK)

University of California San Diego, Dept. Pharmacology, Moores Cancer Center, 9500 Gilman Dr., La Jolla, CA 92093-0636, USA (JSG)

***Table of contents***

**Supplemental Figure 1:** Functional validation of C terminally-tagged FZD<sub>4</sub>-GFP, FZD<sub>4</sub>-mCherry and FZD<sub>4</sub>-Cerulean in comparison to untagged FZD<sub>4</sub> by DVL recruitment.

**Supplemental Figure 2:** Functional validation of N terminally-tagged  $G\alpha_{12}$ -mCherry employing p115-RHOGEF recruitment.

**Supplemental Figure 3:** Functional validation of N terminally-tagged  $G\alpha_{13}$ -mCherry employing p115-RHOGEF recruitment.

**Supplemental Figure 4:** Quantification of LPA<sub>1</sub> receptor-mediated p115-RHOGEF-GFP recruitment.

**Supplemental Figure 5:** Expression levels of FZD<sub>4</sub>-GFP and forskolin-induced DMR responses in wt and  $G\alpha_{12/13}$ -knock out HEK293 cells.

**Supplemental Figure 6:** Expression levels of DVL1, 2, 3 in HEK293 cells treated with ctrl and panDVL siRNA.

**Supplemental Figure 1: Functional validation of C terminally-tagged FZD<sub>4</sub>-GFP, FZD<sub>4</sub>-mCherry and FZD<sub>4</sub>-Cerulean in comparison to untagged FZD<sub>4</sub> by DVL recruitment.**

HEK293 cells were transfected with DVL1-FLAG alone (**A, B**) or in combination with human FZD<sub>4</sub>-untagged, FZD<sub>4</sub>-GFP, FZD<sub>4</sub>-mCherry or FZD<sub>4</sub>-Cerulean at a 3:1 DNA ratio receptor:DVL (**C-J**). After 24 h, cells were fixed in 4% PFA and stained by indirect immunocytochemistry with an anti-FLAG primary antibody and a Cy5-conjugated secondary antibody. Similar to what is known from other Class Frizzled receptors (Tauriello et al., 2012) and the C terminally tagged mouse FZD<sub>4</sub>-GFP (Bryja et al., 2007), the C terminally-tagged versions of human FZD<sub>4</sub> used in this study efficiently recruited DVL1-FLAG from intracellular aggregates (see punctate pattern of DVL1-FLAG in absence of FZD coexpression) to a clear membrane localization. Since the C terminal KTxxxW sequence and the flanking regions of the third intracellular loop are involved in FZD-mediated DVL recruitment (Tauriello et al., 2012), this assay validates both membrane integration and functionality of the engineered human FZD<sub>4</sub>. The white square marks the magnified area shown in the single-channel images. Size bars 20  $\mu$ m. The ZEN2013 software was used to generate intensity profiles of the present fluorophores along a line passing through a single cell (**B, D, F, H, J**). Profiles were created spanning from membrane to membrane crossing the cytosol but excluding the nucleus (white line across cell). The experiments were done three times and the results are summarized in the bar graph in (**K**). Between 12 and 296 cells per condition and independent experiment were counted by an observer blinded to the experimental condition Data are presented as mean $\pm$ SEM. \*\*\*  $p < 0.001$  (all columns compared to control without FZD<sub>4</sub> expression). For figure see next page.

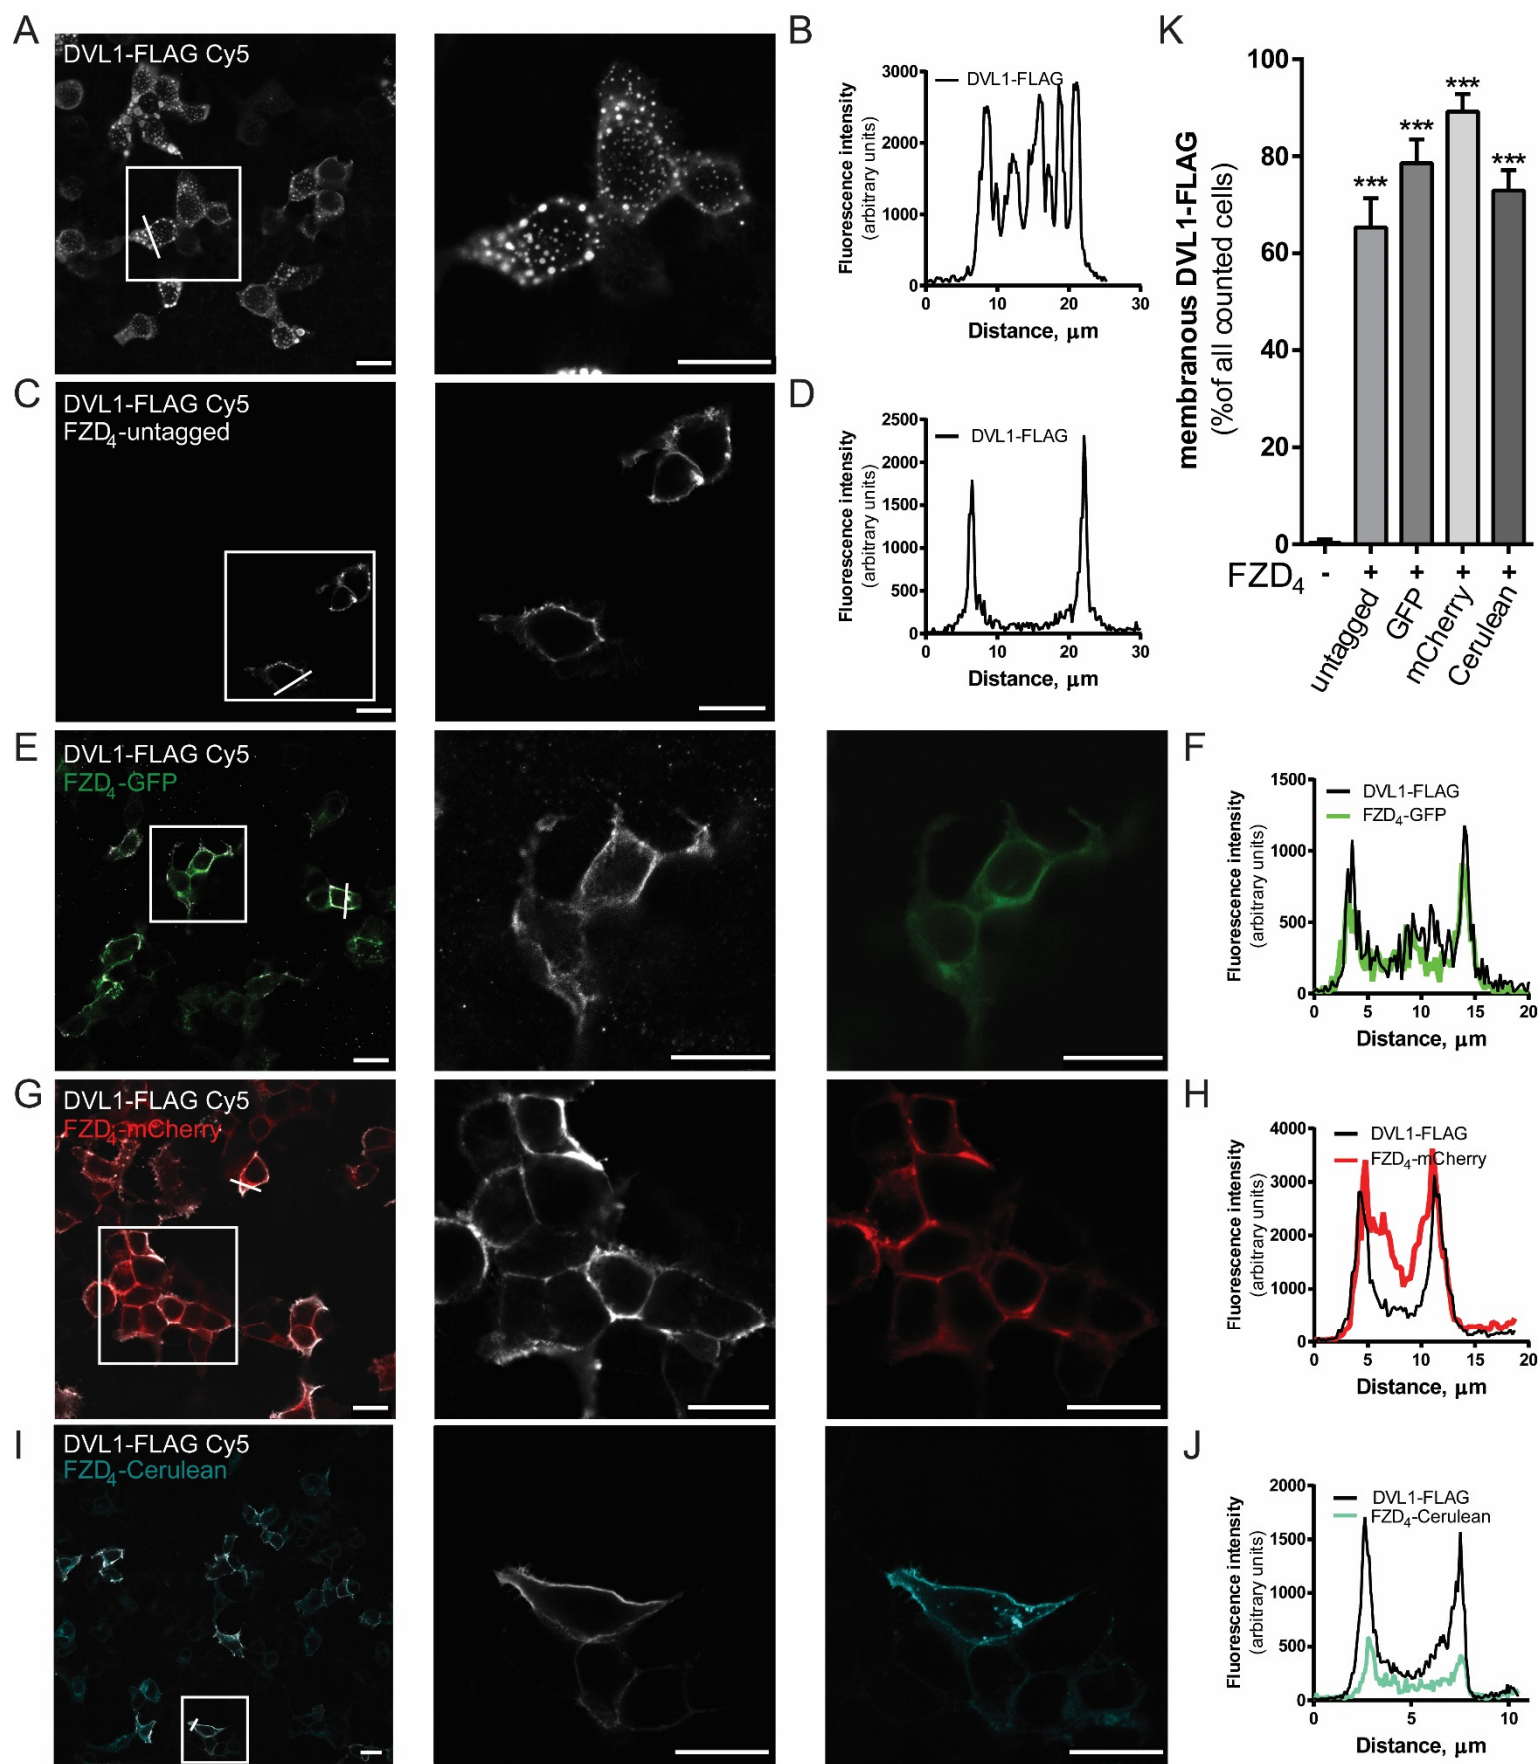

**Supplemental Figure 2: Functional validation of N terminally-tagged  $G\alpha_{12}$ -mCherry employing p115-RHOGEF recruitment.**

HEK293 cells were expressed with p115-RHOGEF-GFP, LPA<sub>1</sub> receptor (untagged), and N terminally-tagged  $G\alpha_{12/13}$ -mCherry either alone or in combination (indicated in the figure). In all conditions, untagged  $\beta\gamma$  subunits were coexpressed. p115-RHOGEF-GFP shows an even cytosolic distribution, which is not affected by cotransfection with LPA<sub>1</sub> receptor or with  $G\alpha_{12}$ -mCherry. However, the combination of  $G\alpha_{12}$ -mCherry and LPA<sub>1</sub> receptor induced a strong recruitment of p115-RHOGEF-GFP to the membrane-localized  $G\alpha_{12}$ -mCherry. Both the strict membrane localization and the effective p115-RHOGEF-GFP membrane recruitment underline that correct processing and functionality of the N terminally-tagged  $G\alpha_{12}$ -mCherry used in this study. The white square marks the magnified area shown in the single-channel images. Size bars 20  $\mu\text{m}$ . N=3. Data quantification is presented in Supplemental Figure 4A. The ZEN2013 software was used to generate intensity profiles of the present fluorophores along a line passing through a single cell (white line across cell).

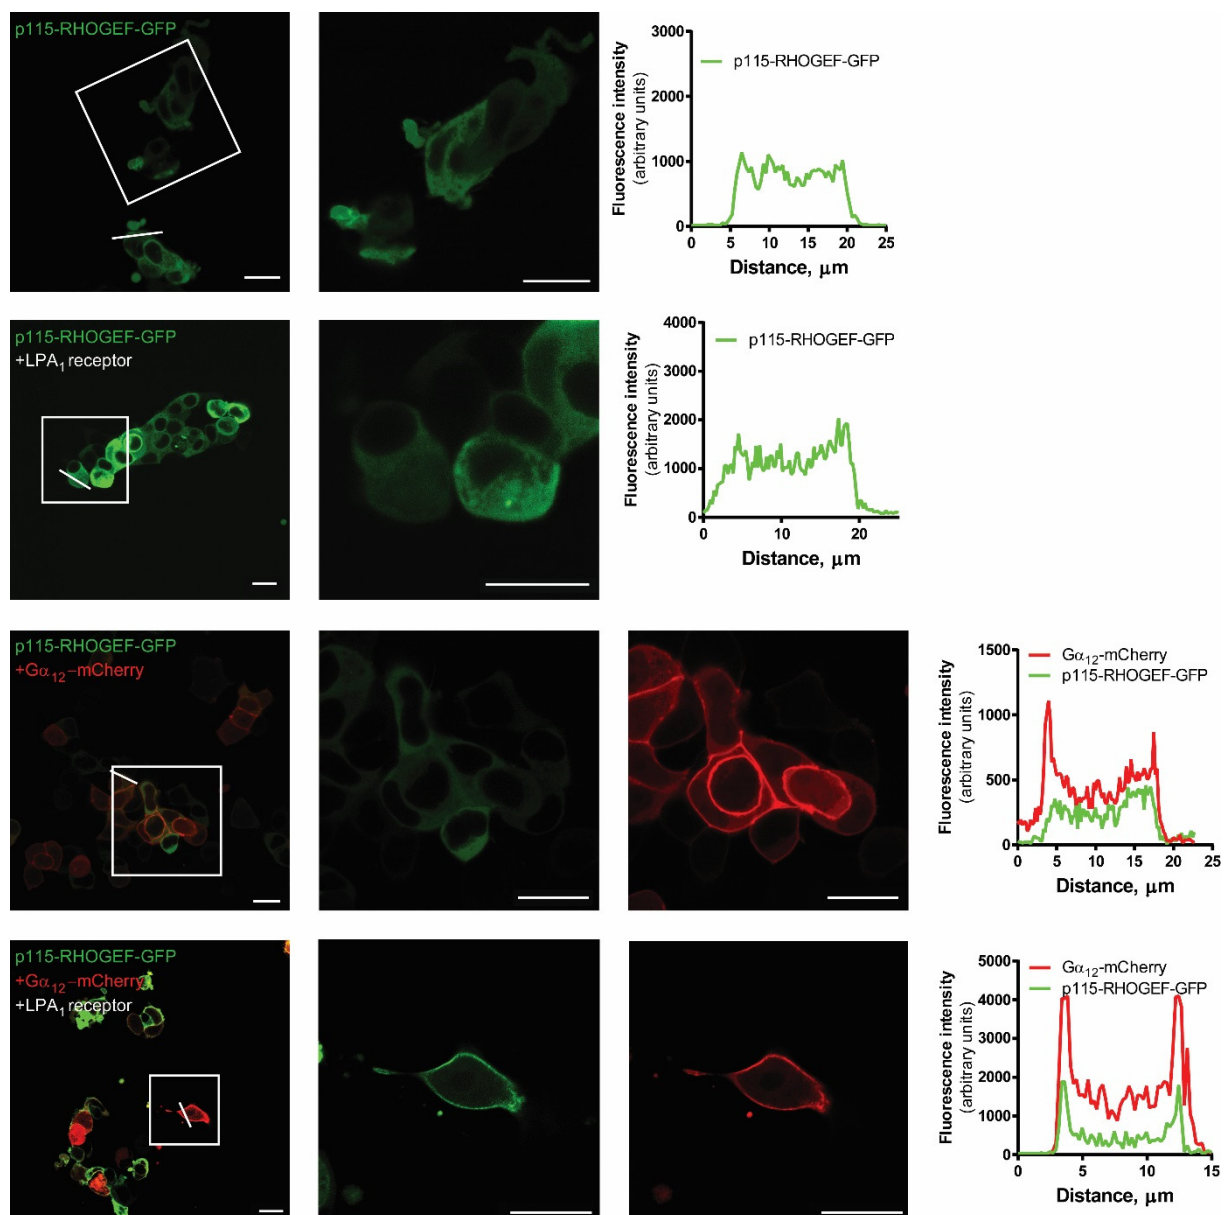

**Supplemental Figure 3: Functional validation of N terminally-tagged  $G\alpha_{13}$ -mCherry employing p115-RHOGEF recruitment.** HEK293 cells were expressed with p115-RHOGEF-GFP, LPA<sub>1</sub> receptor (untagged), and N terminally-tagged  $G\alpha_{13}$ -mCherry. In all conditions, untagged  $\beta\gamma$  subunits were coexpressed. p115-RHOGEF-GFP shows an even cytosolic distribution, which is not affected by cotransfection with LPA<sub>1</sub> receptor or with  $G\alpha_{13}$ -mCherry (see Supplemental Figure 2). However, the combination of  $G\alpha_{13}$ -mCherry and LPA<sub>1</sub> receptor induced a strong recruitment of p115-RHOGEF-GFP to the membrane-localized  $G\alpha_{13}$ -mCherry. Both the strict membrane localization and the effective p115-RHOGEF-GFP membrane recruitment underline that correct processing and functionality of the N terminally-tagged  $G\alpha_{13}$ -mCherry used in this study. The white square marks the magnified area shown in the single-channel images. Size bars 20  $\mu\text{m}$ . N=3. Data quantification is presented in Supplemental Figure 4B. The ZEN2013 software was used to generate intensity profiles of the present fluorophores along a line passing through a single cell (see arrow).

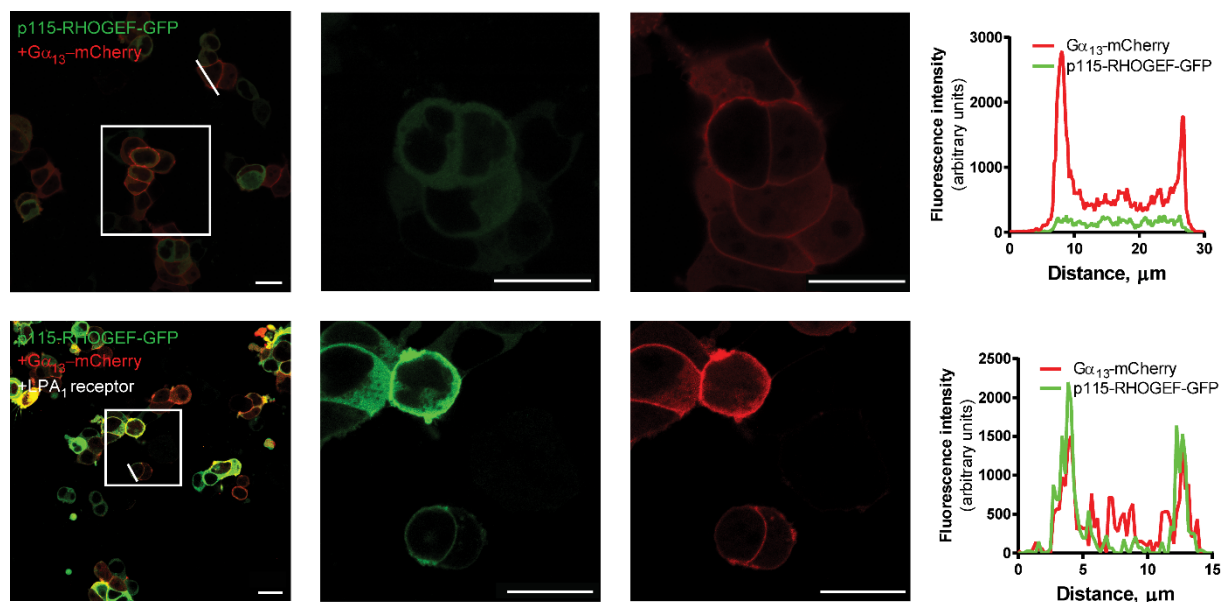

**Supplemental Figure 4: Quantification of LPA<sub>1</sub> receptor-mediated p115-RHOGEF-GFP recruitment.** Bar Graphs provide quantitation of the data presented in Supplemental Figure 2 and 3. HEK293 cells were transfected with p115-RHOGEF-GFP, LPA<sub>1</sub> receptor (untagged), either N terminally-tagged G $\alpha_{12}$  (**A**) or G $\alpha_{13}$ -mCherry (**B**). In all conditions, untagged  $\beta\gamma$  subunits were coexpressed. Cells were left either untreated or treated with 10  $\mu$ M of the LPA<sub>1</sub>R selective antagonist/inverse agonist Ki 16425. Data from 3 independent experiments are summarized in bar graphs (mean $\pm$ SEM). More than 60 cells/condition and independent experiment were counted by a blinded observer. \*\* p<0.01; \*\*\* p<0.001.

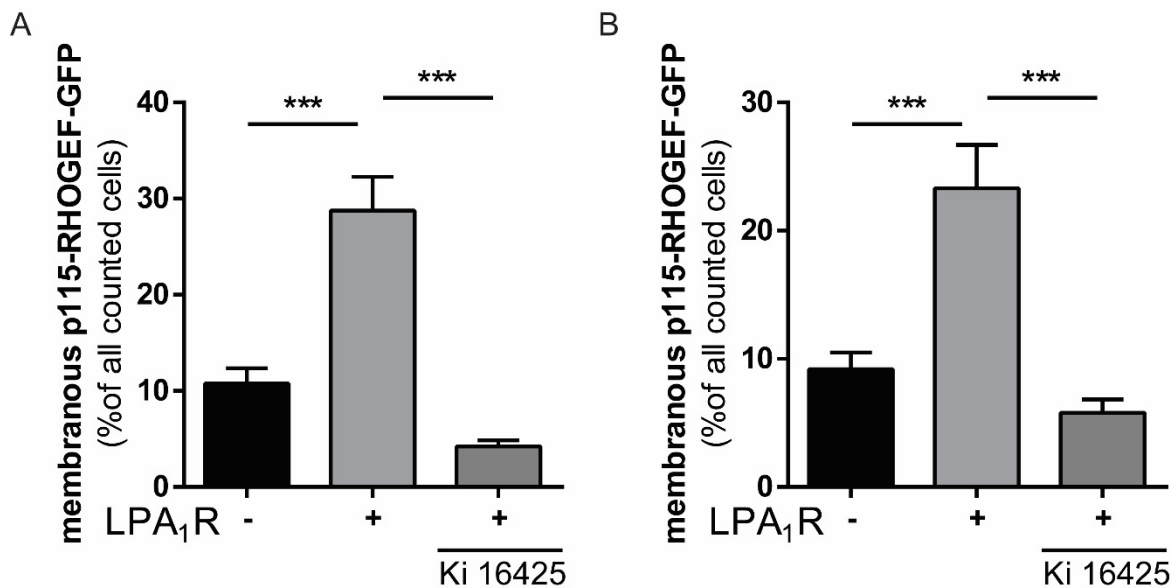



**Supplemental Figure 5: Expression levels of FZD<sub>4</sub>-GFP and forskolin-induced DMR responses in wt and  $G\alpha_{12/13}$ -knock out HEK293 cells. (A-D)** Brightfield and GFP channel images of HEK293 wild-type (A,B) or  $G\alpha_{12/13}$  KO HEK293 cells (C,D) transfected with pcDNA3.1(+) or FZD<sub>4</sub>-GFP. Scale bar indicates 100 $\mu$ m. (E) Quantification of FZD<sub>4</sub>-GFP expression by measuring fluorescence intensity of GFP-tagged receptor constructs. (F,G) Forskolin (fsk)-induced DMR response of HEK293 wild-type (F) and  $G\alpha_{12/13}$  KO HEK293 cells (G) either transfected with empty vector or FZD<sub>4</sub>-GFP. Shown are representative traces, buffer corrected and measured in triplicates +SEM.

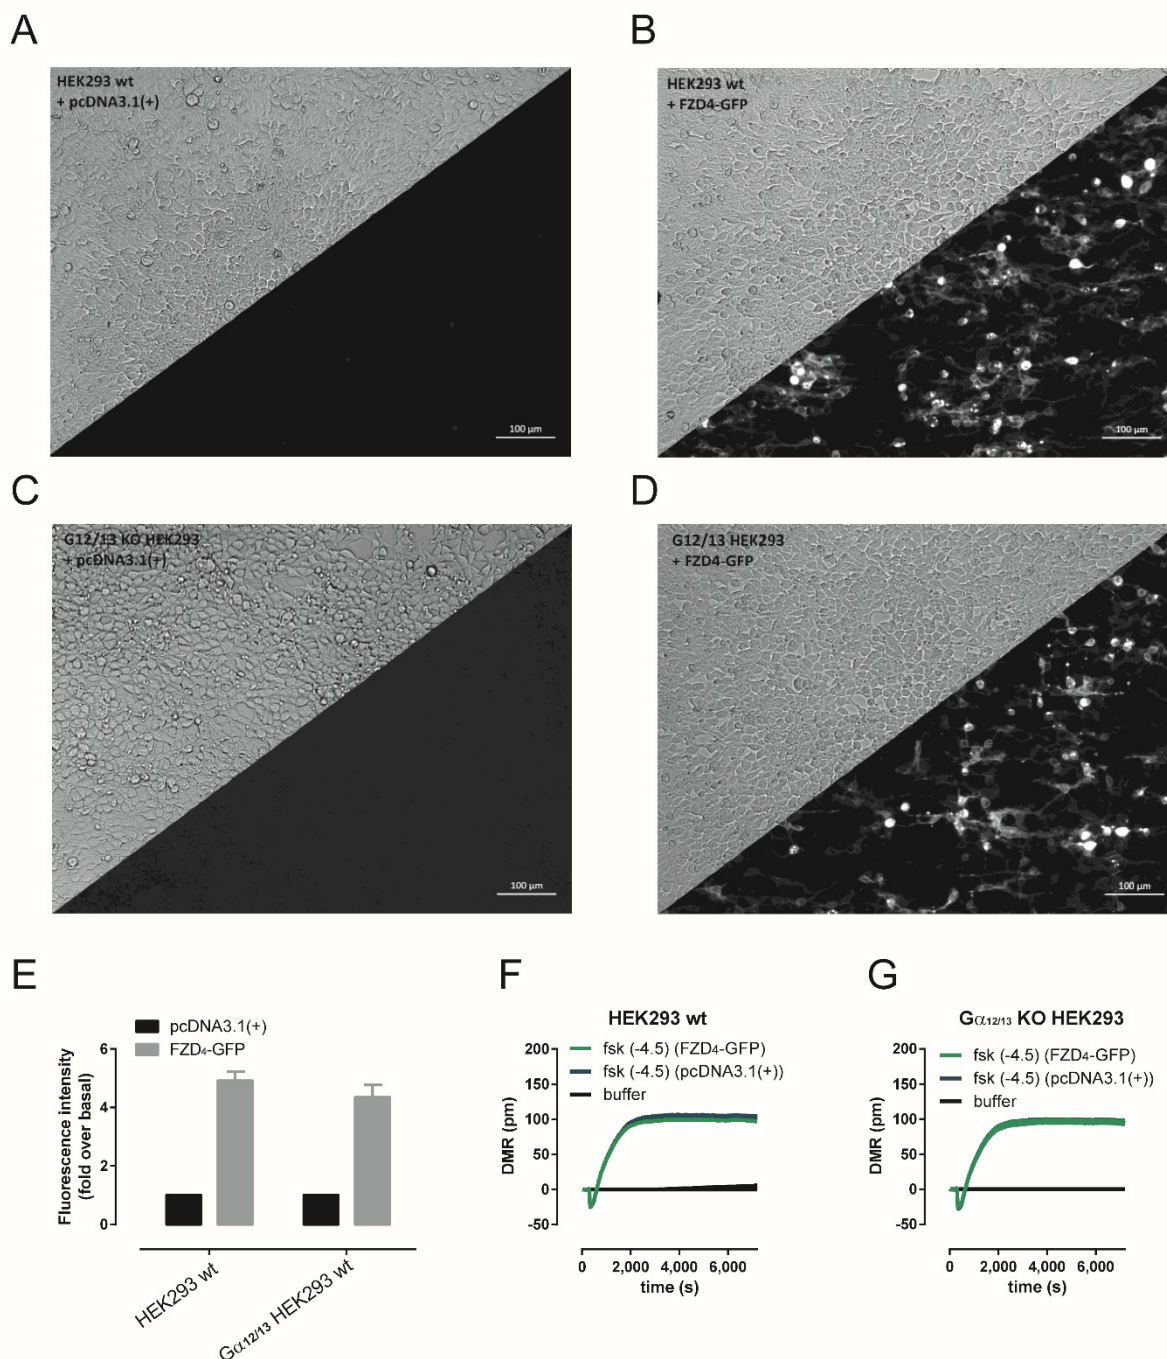

**Supplemental Figure 6: Expression levels of DVL1, 2, 3 in HEK293 cells treated with ctrl and panDVL siRNA.** The bar graph summarizes three independent experiments (corresponding to Fig. 5B), where DVL1, 2, 3 expression was quantified by densitometry of an immunoblot analysing cell lysates from ctrl siRNA and panDVL siRNA treated HEK293 cells. Endogenous levels of DVL1, 2, 3, were detected with anti-DVL1, 2 or 3 antibodies and quantified. DVL values were normalized to  $\beta$ -actin expression. Graph presents mean $\pm$ SEM.

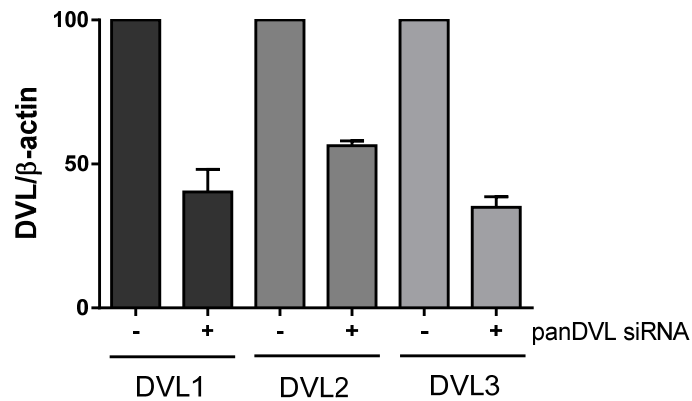



**References**

- Bryja V, Gradl D, Schambony A, Arenas E and Schulte G (2007) beta-arrestin is a necessary component of Wnt/beta-catenin signaling in vitro and in vivo. *P Natl Acad Sci USA* **104**(16): 6690-6695.
- Tauriello DV, Jordens I, Kirchner K, Slootstra JW, Kruitwagen T, Bouwman BA, Noutsou M, Rudiger SG, Schwamborn K, Schambony A and Maurice MM (2012) Wnt/beta-catenin signaling requires interaction of the Dishevelled DEP domain and C terminus with a discontinuous motif in Frizzled. *Proc Natl Acad Sci U S A* **109**(14): E812-820.
